# Supplementary material for: Protein Folding Requires Crowd Control in a Simulated Cell
Source: PubMed Central journal article supplement (PMC2891488; doi:10.1016/j.jmb.2010.01.074), 2010-04-16
Supplement: mmc1.pdf [file mmc1.pdf]

## Supplementary material

### Proteins used for prediction and crowding studies

| PDB code | SS            | Length | Description (from PDB entry)                                                            | Used in crowding study? |
|----------|---------------|--------|-----------------------------------------------------------------------------------------|-------------------------|
| 1a6s     | $\alpha$      | 87     | Bioactive retroviral M domain from <i>Rous sarcoma</i> virus                            | No                      |
| 1a8o     | $\alpha$      | 66     | C-terminal dimerization domain of the HIV-1 capsid protein                              | Yes                     |
| 1aa3     | $\alpha\beta$ | 63     | C-terminal domain of <i>E. coli</i> RecA protein                                        | No                      |
| 1ail     | $\alpha$      | 70     | RNA-binding domain of the influenza virus NS1 protein                                   | Yes                     |
| 1aiw     | $\beta$       | 62     | Cellulose-binding domain of the endoglucanase Z secreted by <i>Erwinia chrysanthemi</i> | No                      |
| 1c5a     | $\alpha$      | 65     | Porcine C5ades*Arg from 1H                                                              | Yes                     |
| 1csp     | $\beta$       | 67     | Universal nucleic acid-binding domain from <i>B. subtilis</i> major cold-shock protein  | No                      |
| 1ctf     | $\alpha\beta$ | 68     | C-terminal domain of the ribosomal protein L7/L12 from <i>E. coli</i>                   | Yes                     |
| 1dv0a    | $\alpha$      | 45     | C-terminal UBA domain of the human homologue of RAD23A                                  | No                      |
| 1fwp     | $\alpha\beta$ | 69     | CheY-binding domain of the chemotaxis kinase CheA                                       | No                      |
| 1gab     | $\alpha$      | 53     | Albumin-binding GA module                                                               | Yes                     |
| 1hyp     | $\alpha$      | 75     | Hydrophobic protein from soybean                                                        | Yes                     |
| 1ig5a    | $\alpha\beta$ | 75     | Bovine calbindin D9K binding Mg <sup>2+</sup>                                           | Yes                     |
| 1lea     | $\alpha\beta$ | 72     | LexA repressor DNA binding domain                                                       | Yes                     |
| 1msi     | $\alpha\beta$ | 66     | Structure of antifreeze glycoprotein QAE                                                | No                      |
| 1ngr     | $\alpha$      | 85     | Death domain of the p75 neurotrophin receptor                                           | No                      |
| 1nkl     | $\alpha$      | 78     | NK-lysin from pig                                                                       | Yes                     |
| 1nre     | $\alpha$      | 81     | N-terminal domain of alpha2-macroglobulin receptor-associated protein                   | Yes                     |
| 1orc     | $\alpha\beta$ | 64     | Cro repressor insertion mutatnt K56-[DGEVK]                                             | No                      |
| 1pgx     | $\alpha\beta$ | 70     | B2 immunoglobulin-binding domain of streptococcal protein G                             | No                      |
| 1pou     | $\alpha$      | 71     | Oct-1 POU-specific domain                                                               | Yes                     |
| 1res     | $\alpha$      | 43     | DNA binding domain of gamma delta resolvase                                             | No                      |
| 1stu     | $\alpha\beta$ | 68     | dsRNA binding domain from <i>Drosophila</i> staufer protein                             | No                      |
| 1ten     | $\beta$       | 90     | Fibronectin type III domain from tenascin                                               | No                      |
| 1vcc     | $\alpha\beta$ | 77     | N-terminal fragment of vaccinia virus DNA topoisomerase I                               | No                      |
| 1vif     | $\beta$       | 60     | Dihydrofolate reductase from trimethoprim-resistant bacteria                            | No                      |
| 1vig     | $\alpha\beta$ | 71     | Vigilin KH domain                                                                       | No                      |
| 2ezh     | $\alpha$      | 65     | I gamma subdomain of the Mu end DNA-binding domain of phage Mu transposase              | Yes                     |
| 2fow     | $\alpha\beta$ | 76     | RNA binding domain of ribosomal protein L11                                             | No                      |
| 5pti     | $\alpha\beta$ | 58     | Bovine pancreatic trypsin inhibitor                                                     | No                      |
